# Supplementary material for: Strategies for Protecting Cereals and Other Utility Plants Against Cold and Freezing Conditions—A Mini-Review
Source: MDPI journal article supplement (doi:10.3390/agriculture15232407), 2025-11-21
Supplement: s1 [file agriculture-3961564-supplementary.pdf › agriculture-3961564-supplementary.pdf]

**Table S1.** Low temperature protection methods in different plant species.

| methods                                  |                                    | example of plants                                   | exemplary effects                                                                                                                    | reference  |
|------------------------------------------|------------------------------------|-----------------------------------------------------|--------------------------------------------------------------------------------------------------------------------------------------|------------|
| agrotechnical methods                    | covers                             | tomato                                              | - increased yield                                                                                                                    | [15]       |
|                                          | fogging                            | mango trees<br>citrus                               | - increased yield<br>- decreased number of leaf injuries                                                                             | [13, 18]   |
|                                          | sprinkler irrigation               | fruit trees<br>strawberry<br>tea                    | - lower mortality of flowers<br>- higher yields                                                                                      | [14, 19]   |
|                                          | air disturbance                    | fruit trees<br>tea<br>grapevine                     | - reduced frost injuries                                                                                                             | [19]       |
|                                          | heaters                            | grapevines<br>fruit trees                           | - reduced frost injuries                                                                                                             | [19-21]    |
| biochemical treatments – phytohormones   | abscisic acid                      | wheat<br>rice<br>maize<br>grapevine<br>chickpea     | - higher soluble sugar accumulation<br>- increased antioxidant activity<br>- altered chloroplast structure                           | [4, 24-33] |
|                                          | salicylic acid                     | wheat<br>barley<br>maize<br>spinach<br>cabbage      | - increased antioxidant activity<br>- increased proline content<br>- lower membrane injuries<br>- improved photosynthetic efficiency | [34-39]    |
|                                          | jasmonic acid/<br>methyl jasmonate | wheat<br>tomato                                     | - increased antioxidant activity<br>- increased proline content<br>- improved photosynthetic efficiency                              | [40-42]    |
|                                          | cytokinins                         | rice<br>coffee                                      | - increased antioxidant activity<br>- delayed chlorophyll degradation                                                                | [43-44]    |
|                                          | auxins                             | oilseed rape                                        | - rearrangement of protein composition                                                                                               | [45]       |
|                                          | brassinosteroids                   | wheat<br>maize<br>rye<br>oilseed rape               | - increased antioxidant activity<br>- higher soluble sugar accumulation<br>- improved photosynthetic efficiency                      | [48-54]    |
| biochemical treatments – osmoprotectants | proline                            | maize<br>oilseed rape<br>citrus<br>quinoa<br>pepper | - increased antioxidant activity<br>- improved germination rate<br>- increased proline content                                       | [58-61]    |
|                                          | glycine betaine                    | wheat<br>tomato<br>maize                            | - increased antioxidant activity<br>- higher soluble sugar accumulation<br>- improved germination rate                               | [63-65]    |
|                                          | inositol                           | oilseed rape                                        | - increased Ca <sup>2+</sup> influx                                                                                                  | [71]       |
|                                          | polyamines                         | wheat<br>maize<br>oilseed rape<br>grapevine         | - decreased chlorophyll degradation<br>- lower membrane injuries<br>- increased proline content<br>- increased antioxidant activity  | [75-78]    |
| biochemical treatments –                 | chitosan                           | rice                                                | - improved photosynthetic efficiency<br>- higher root and shoot weight                                                               | [80]       |

|                                      |                                                                     |                                                |                                                                                                                                   |           |
|--------------------------------------|---------------------------------------------------------------------|------------------------------------------------|-----------------------------------------------------------------------------------------------------------------------------------|-----------|
| biocompounds<br>and other substances | silicone                                                            | barley<br>soybean                              | - increased antioxidant activity<br>- higher soluble sugar accumulation<br>- increased diversity of microorganisms in rhizosphere | [83, 84]  |
|                                      | melatonin                                                           | wheat<br>rice<br>oilseed rape<br>tea<br>tomato | - increased antioxidant activity<br>- higher osmoprotectants content<br>- improved photosynthetic efficiency                      | [87-93]   |
|                                      | microelements<br>(Se, Mb, Zn, Ca, P)                                | wheat<br>rice<br>tea<br>tobacco                | - increased antioxidant activity<br>- improved photosynthetic efficiency<br>- maintaining hormonal balance                        | [95-100]  |
|                                      | sodium alginate, kaolin, humic acid                                 | grapevine                                      | - higher soluble sugar accumulation<br>- decreased ROS content                                                                    | [101-103] |
|                                      | sugars (glucose, sucrose)                                           | melon<br>cucumber                              | - higher soluble sugar accumulation<br>- increased antioxidant activity                                                           | [104-105] |
|                                      | strigolactones                                                      | pepper<br>litchi                               | - reduced photoinhibition<br>- increased photosynthetic efficiency<br>- increased expression of cold tolerance genes              | [107]     |
| Plant-microbe interactions           | - arbuscular mycorrhizal fungi<br>- plant growth promoting bacteria | rice<br>barley                                 | - increased proline content<br>- lower membrane injuries<br>- increased antioxidant activity<br>- higher yields                   | [110-112] |
